# Supplementary material
Source: PubMed Central journal article supplement (PMC3220882)
Supplement: NIHMS333726-supplement-01.pdf [file NIHMS333726-supplement-01.pdf]

**Table 5 (e-supplement). Summary of area under the curve (AUC) for the prediction of severe AKI (pRIFLE=F or I) using individual urinary biomarkers.**

| Biomarker | T=2h<br>(N=208, 26 events*) |          | T=6h<br>(N=211, 31 events*) |          | T=12h<br>(N=204, 29 events*) |          | T=24h<br>(N=205, 33 events*) |          |
|-----------|-----------------------------|----------|-----------------------------|----------|------------------------------|----------|------------------------------|----------|
|           | AUC<br>(95% CI)             | P-value  | AUC<br>(95% CI)             | P-value  | AUC<br>(95% CI)              | P-value  | AUC<br>(95% CI)              | P-value  |
| NGAL      | 0.91<br>(0.83, 0.99)        | < 0.0001 | 0.92<br>(0.86, 0.98)        | < 0.0001 | 0.92<br>(0.87, 0.97)         | 0.0001   | 0.92<br>(0.85, 0.98)         | 0.0006   |
| IL-18     | 0.62<br>(0.51, 0.73)        | 0.04     | 0.76<br>(0.66, 0.85)        | 0.0002   | 0.81<br>(0.74, 0.89)         | < 0.0001 | 0.77<br>(0.68, 0.85)         | < 0.0001 |
| L-FABP    | 0.57<br>(0.45, 0.68)        | 0.38     | 0.84<br>(0.77, 0.92)        | < 0.0001 | 0.83<br>(0.75, 0.90)         | < 0.0001 | 0.79<br>(0.70, 0.88)         | < 0.0001 |
| KIM-1     | 0.46<br>(0.35, 0.57)        | 0.94     | 0.51<br>(0.41, 0.61)        | 0.79     | 0.80<br>(0.70, 0.89)         | < 0.0001 | 0.84<br>(0.76, 0.92)         | < 0.0001 |

\* Event means severe AKI.
